# Supplementary material for: A new recyclable polymer based on Diels–Alder crosslinking networks derived from anisaldehyde
Source: Royal Society of Chemistry journal article supplement (doi:10.1039/d4py00759j), 2024-11-19
Supplement: d4py00759j1.pdf [file d4py00759j1.pdf]

## Supplementary Information

# A New Recyclable Polymer Based on Diels-Alder Crosslinking Networks Derived from Anisaldehyde

Caiyun Wang, Weibo Liu, Keying Wang, Kaili Wang, Bowen Deng, Liqiang Wan, Qiaolong  
Yuan, Farong Huang\*

(Key Laboratory of Specially Functional Polymeric Materials and Related Technology (Ministry of Education), School of Materials Science and Engineering, East China University of Science and Technology, Shanghai 200237, China)

\*Corresponding author: Farong Huang (E-mail: [fhuanglab@ecust.edu.cn](mailto:fhuanglab@ecust.edu.cn))

### Materials and instruments

4,4'-Bismaleimidodiphenylmethane by Shanghai Meryer Chemical Technology Co. Ltd, China. 1,2-Ethanedithiol was provided by TCI Co. Epichlorohydrin, sodium hydride, azodiisobutyronitrile, tetrabutylammonium bromide and all ultra-dry solvents (including toluene, tetrahydrofuran) were provided by Beijing InnoChem Science & Technology Co., Ltd. Methyltriphenylphosphonium bromide and potassium tert-butoxide were purchased from Shanghai Haohong scientific Co., Ltd. Bisphenol A epoxy resin was bought from Bidepharm.

$^1\text{H}$  NMR and  $^{13}\text{C}$  NMR spectra were recorded on a Bruker 400 spectrometer (Switzerland) with  $\text{CDCl}_3$  or  $\text{DMSO-}d_6$  as the solvent. Fourier transform infrared spectra (FT-IR) were characterized on Thermo Scientific Nicolet spectrometer (USA) using a Smart Orbit Diamond, and the scanning range was from 400 to  $4000\text{ cm}^{-1}$ . Elemental analysis tests were conducted on the VARIO EL CUBE elemental analyzer (ELEMENTAR, Germany). High-resolution mass spectra (HRMS) were characterized on a XEVO G2 TOF instrument produced in Waters company

(USA). Gel permeation chromatography (GPC) analysis was conducted on a Waters 1515 chromatography instrument (USA) with polystyrene as the standard and tetrahydrofuran as a solvent at a flow rate of 1 mL·min<sup>-1</sup>. Differential scanning calorimetry analysis (DSC) were operated with a Q2000 DSC (TA, USA) at a heating rate of 10 °C min<sup>-1</sup> between 40 and 200 °C under N<sub>2</sub> flow with a flowing rate of 50 mL min<sup>-1</sup>. Thermogravimetric analysis (TGA) was detected on Germany Mettler Toledo apparatus at a heating rate of 10 °C min<sup>-1</sup> from room temperature to 800 °C under N<sub>2</sub> with a flowing rate of 50 mL min<sup>-1</sup>. Dynamic mechanical analysis (DMA) was recorded on a DMA 1 mechanical analyzer (Mettler Toledo, Germany) with a heating rate of 5 °C min<sup>-1</sup> in air. UV–vis–near-infrared (NIR) spectra were detected on a Varian CARY 5000 detector in the wavelength range from 300 to 2000 nm.

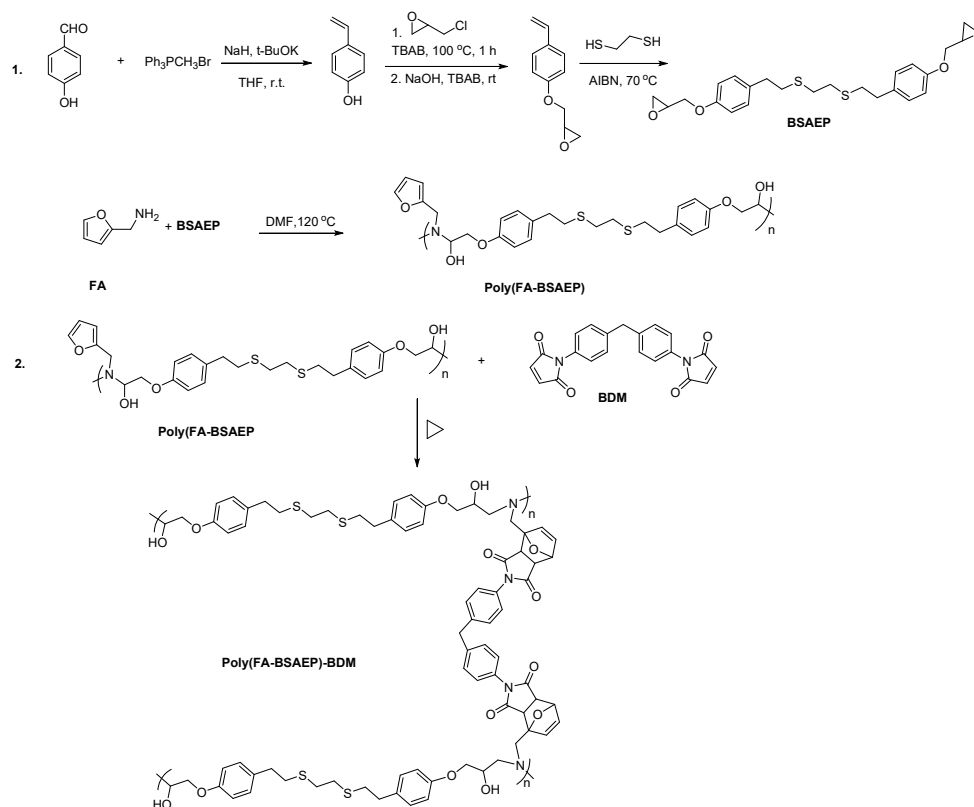

**Scheme S1.** The synthetic route of **Poly(FA-BSAEP)-BDM**

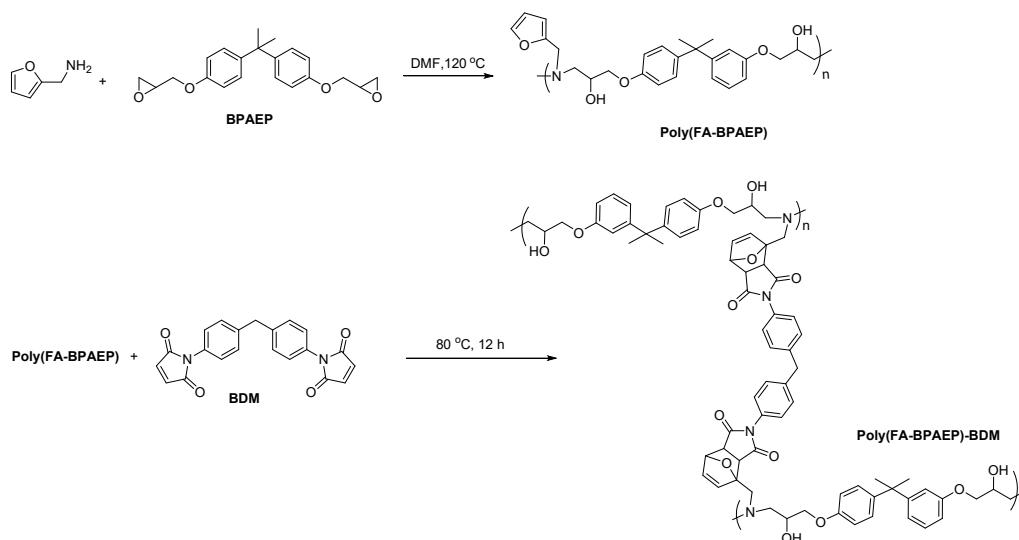

**Scheme S2.** The synthetic route of **Poly(FA-BPAEP)-BDM**

### Synthesis of 4-vinylphenol

To a stirring solution of methyltriphenylphosphonium bromide (64.35 g, 0.18 mol) in a 500 ml three-mouth flask with THF (200 mL), then potassium tert-butoxide (36.81 g, 0.33 mol) and NaH (1.97 g, 0.08 mol) were added. After addition, the mixture was stirred for an additional 15 minutes at room temperature. Then a solution of 4-hydroxybenzaldehyde (20.00 g, 0.16 mol) in THF (50 mL) was added dropwise to the mixture. After stirred at room temperature for 3 h, the reaction system was neutralized with dilute HCl and extracted with ethyl acetate. The organic layer was collected, washed with saturated brine, dried over anhydrous  $\text{Na}_2\text{SO}_4$ , and filtered. After removal of the solvent under reduced pressure, the obtained product was purified by column chromatography of silica gel using a mixture of petroleum ether and ethyl acetate (9:1, v/v) as the eluent to give 4-vinylphenol as a white solid in a yield of 99%.  $^1\text{H}$  NMR (400 MHz,  $\text{DMSO}-d_6$ ,  $\delta$ ):  $^1\text{H}$  NMR 9.52 (s, 1H), 7.37 – 7.21 (m, 2H), 6.84 – 6.70 (m, 2H), 6.68 – 6.51 (m, 1H), 5.58 (dd,  $J = 17.6, 1.0$  Hz, 1H), 5.04 (dd,  $J = 10.9, 1.0$  Hz, 1H).  $^{13}\text{C}$  NMR (101 MHz,  $\text{CDCl}_3$ )  $\delta$  162.59 (s), 141.62 (s), 133.47 (s), 132.64 (s), 120.55 (s), 115.81 (s).

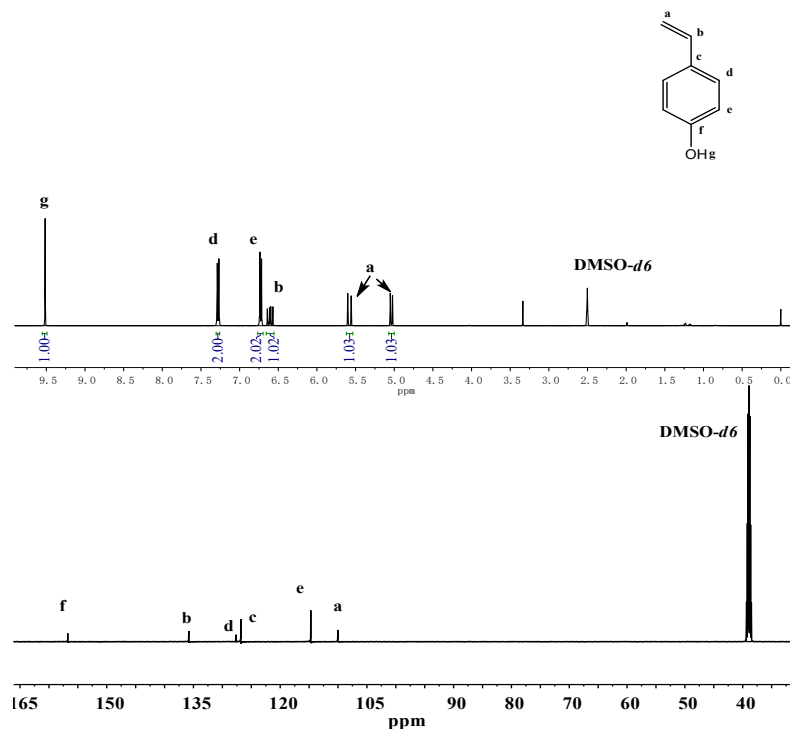

Fig.S1. <sup>1</sup>H NMR and <sup>13</sup>C NMR spectra of 4-vinylphenol monomer (DMSO-*d*<sub>6</sub>)

### Synthesis of 2-((4-vinylphenoxy)methyl)oxirane

4-vinylphenol (14.00 g, 0.12mol) and **TBAB** (1.88 g, 0.12mol) were added to a three-mouth flask, dissolved with epichlorohydrin and reflux at 100 ° C. After 3 hours, the solution was cooled to room temperature and the aqueous solution of NaOH (20 wt %) was added. The mixture was stirred vigorously for 3 h and extracted with dichloromethane. Then, the organic layer was washed with saturated brine, dried over anhydrous Na<sub>2</sub>SO<sub>4</sub>, and concentrated under vacuum. The crude 2-((4-vinylphenoxy)methyl)oxirane was purified by column chromatography on SiO<sub>2</sub> using a mixture of petroleum and ethyl acetate (9:1, v/v) to give pure product as a colorless liquid in a yield of 86%.

<sup>1</sup>H NMR (400 MHz, CDCl<sub>3</sub>) δ 7.33 (d, *J* = 8.6 Hz, 1H), 6.87 (t, *J* = 10.0 Hz, 1H), 6.64 (dd, *J* = 17.6, 10.9 Hz, 1H), 5.60 (d, *J* = 17.6 Hz, 1H), 5.12 (d, *J* = 10.9 Hz, 1H), 4.05 (ddd, *J* = 16.8, 11.0, 4.4 Hz, 1H), 3.32 (qd, *J* = 5.8, 3.1 Hz, 1H), 2.97 – 2.65 (m, 1H).

<sup>13</sup>C NMR (101 MHz, CDCl<sub>3</sub>) δ 158.28 (s), 136.15 (s), 130.98 (s), 127.45 (s), 114.67 (s), 111.91 (s), 68.75 (d, *J* = 11.2 Hz), 50.13 (s), 44.68 (s).

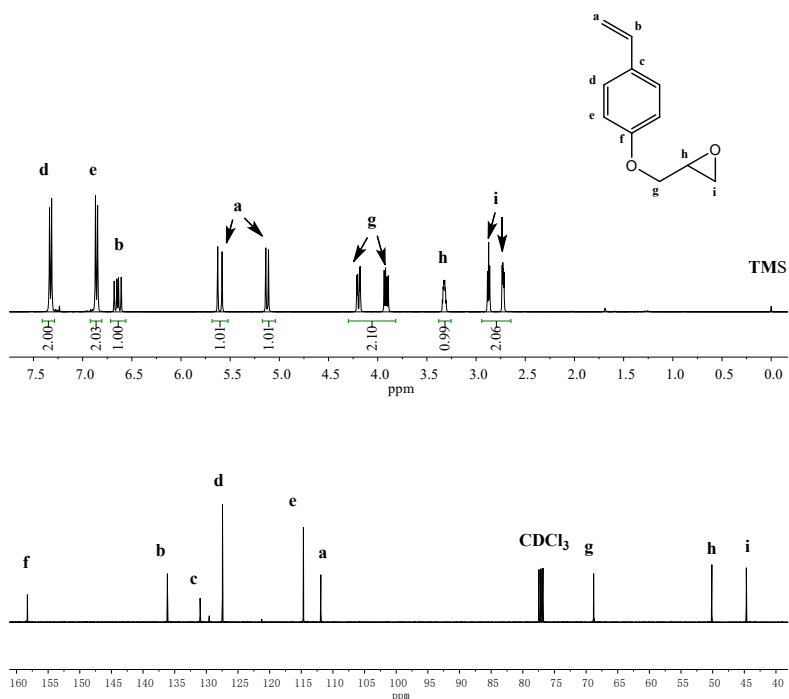

**Fig. S2.** <sup>1</sup>H NMR and <sup>13</sup>C NMR spectra of BSAEP monomer (CDCl<sub>3</sub>)

### Synthesis of 1,2-bis((4-(oxiran-2-ylmethoxy)phenethyl)thio)ethane (BSAEP)

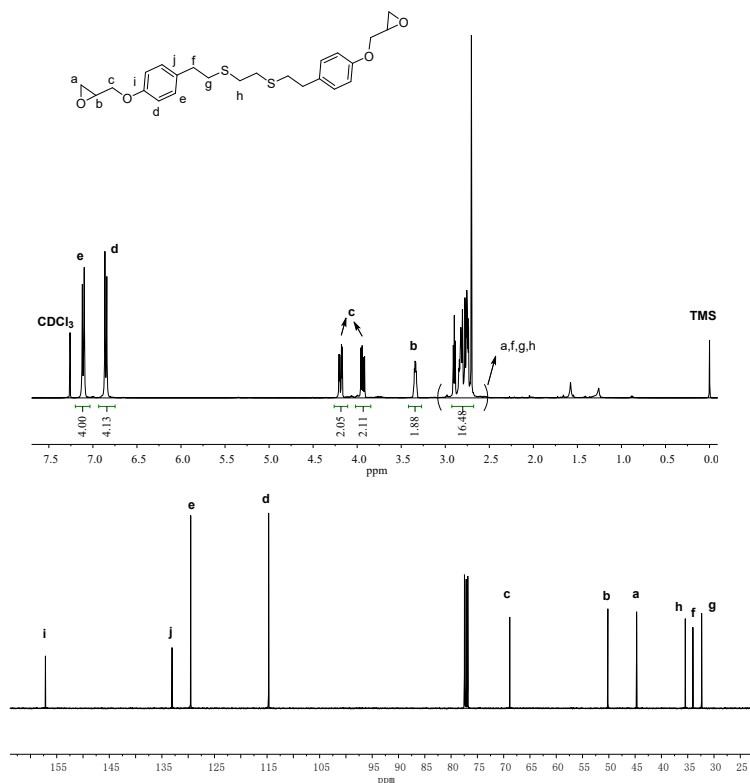

**Fig. S3.** <sup>1</sup>H NMR and <sup>13</sup>C NMR spectra of 2-((4-vinylphenoxy)methyl)oxirane monomer (CDCl<sub>3</sub>)

### Preparation of linear epoxy polymer containing furan group (Poly(FA-BSAEP) and Poly(FA-BPAEP))

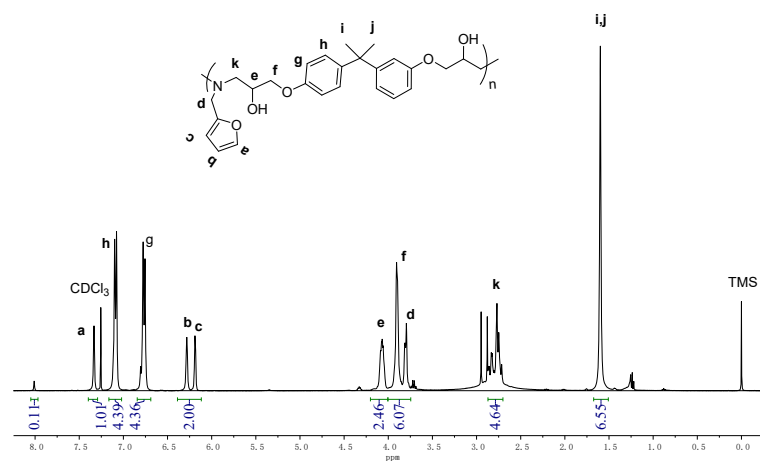

Fig. S4.  $^1\text{H}$  NMR spectra of Poly(FA-BPAEP) monomer ( $\text{CDCl}_3$ )

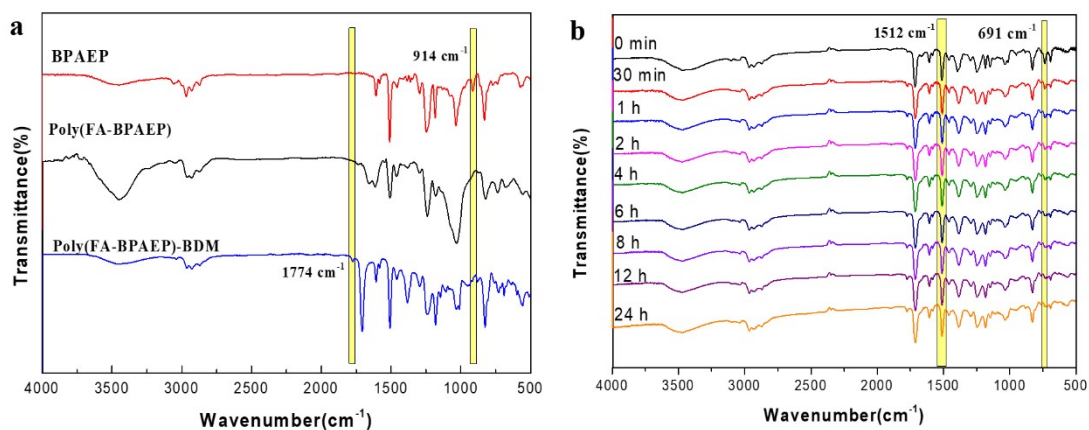

Fig.S5. FT-IR curves (a) of the BPAEP, Poly(FA-BPAEP) and Poly(FA-BPAEP)-BDM , FT-IR curves (b) of the Poly(FA-BPAEP) reacted with BDM at  $80^\circ\text{C}$  for different holding times.

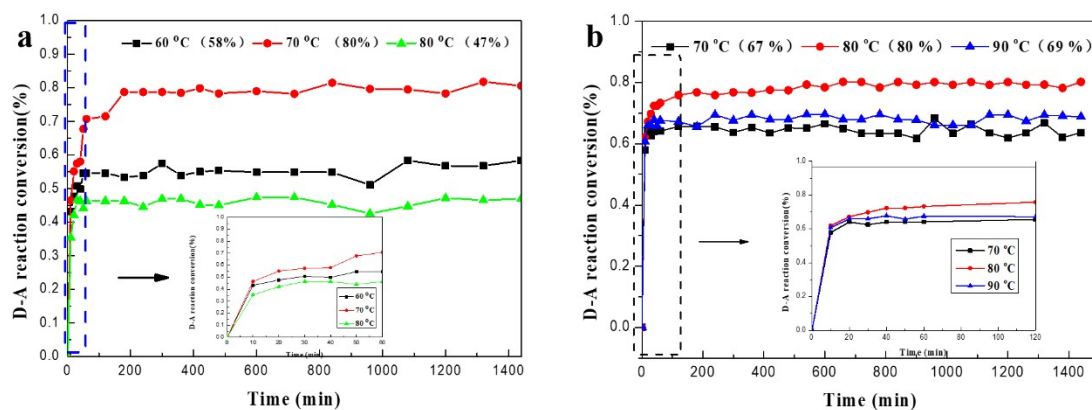

Fig. S6. Reaction degree of the Poly(FA-BSAEP) (a) or Poly(FA-BSAEP) (b) with BDM at different temperature

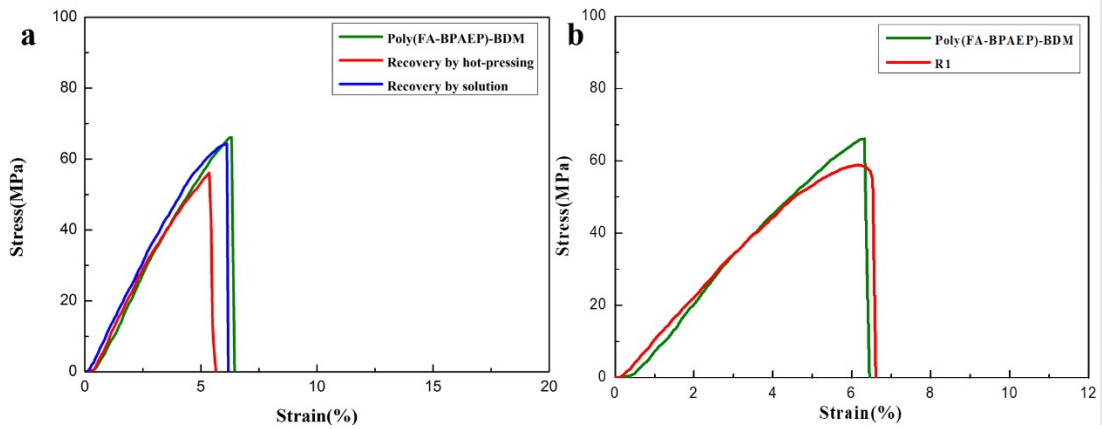

**Fig. S7.** The tensile tests of reprocessed Poly(FA-BPAEP)-BDM ( a. processing using different methods, b. recycle by hot-pressing)

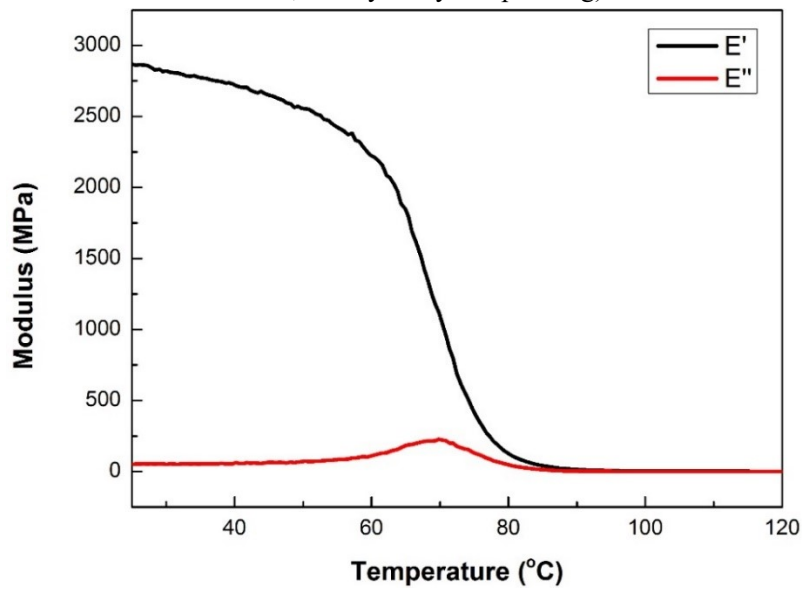

**Fig.S8.** DMA curves of Poly(FA-BPAEP)-BDM

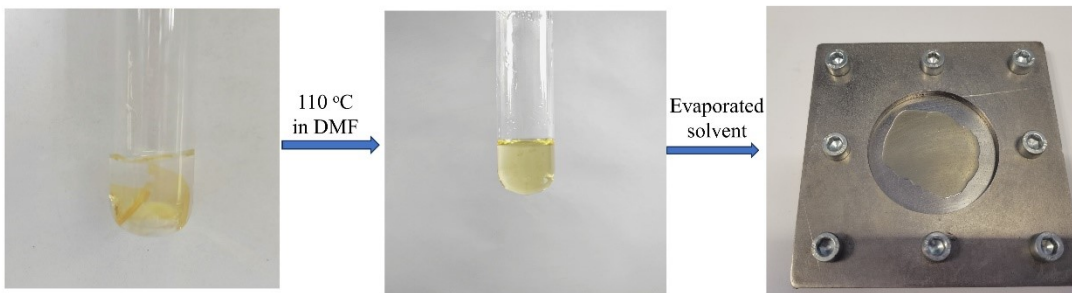

**Fig.S9** Recovery of Poly(FA-BSAEP)-BDM by solution method

**Table S1.** The tensile properties of reprocessed **Poly(FA-BSAEP)-BDM** and **Poly(FA-BPAEP)-BDM**

| <b>Name</b>                        | <b>strength<br/>(Mpa)</b> | <b>Elongation<br/>(%)</b> | <b>Young's<br/>Modulus</b> |
|------------------------------------|---------------------------|---------------------------|----------------------------|
| <b>Poly(FA-BSAEP)-BDM</b>          | 79.7                      | 12.2                      | 8.6                        |
| <b>Poly(FA-BSAEP)-BDM<br/>(R1)</b> | 80.0                      | 11.2                      | 8.8                        |
| <b>Poly(FA-BSAEP)-BDM<br/>(R2)</b> | 78.2                      | 9.7                       | 9.2                        |
| <b>Poly(FA-BSAEP)-BDM<br/>(R3)</b> | 77.9                      | 9.4                       | 10.3                       |
| <b>Poly(FA-BPAEP)-BDM</b>          | 66.1                      | 6.3                       | 13.8                       |
| <b>Poly(FA-BPAEP)-BDM<br/>(R1)</b> | 56.1                      | 5.4                       | 13.2                       |
